# Supplementary material for: Improved cycling stability of MoS2-coated carbon nanotubes on graphene foam as flexible anodes for lithium-ion batteries
Source: Royal Society of Chemistry journal article supplement (doi:10.1039/c6nj02238c), 2016-11-15
Supplement: c6nj02238c1.pdf [file c6nj02238c1.pdf]

## Electronic Supporting Information

### Improved Cycling Stability of MoS<sub>2</sub>-coated Carbon Nanotubes on Graphene Foam as a Flexible Anode for Lithium-ion Batteries

*Xiaoxuan Ma , Xusong Liu , Jiupeng Zhao\* , Jian Hao , Caixia Chi , Xiaoxu Liu\* , Yao Li\* ,*

*Shikun Liu , Kun Zhang*

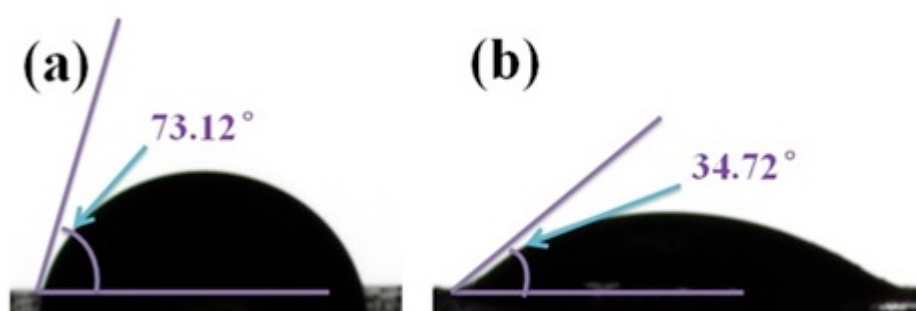

**Fig. S1.** The change of Water contact angles on surfaces of (a) GCN and (b) GCNM

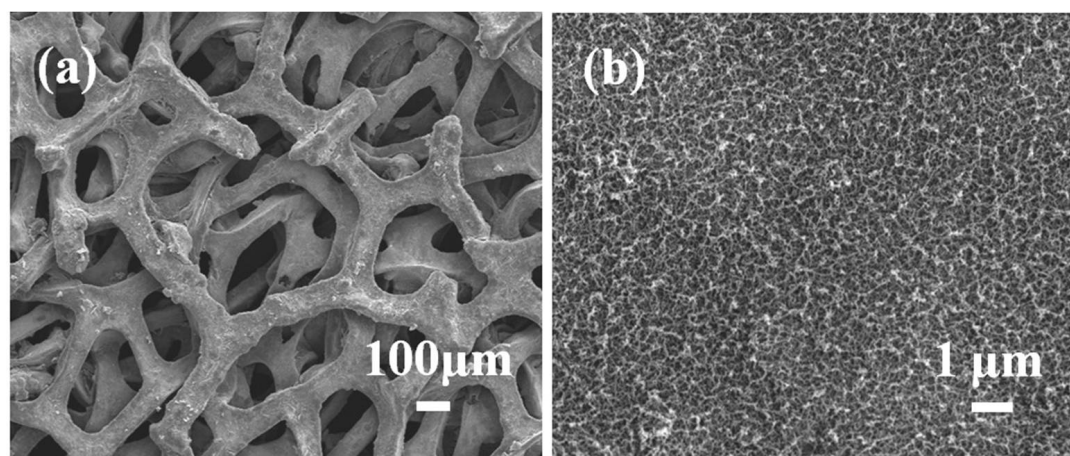

**Fig. S2.** SEM images of (a) low-magnification of GCN; (b) high-magnification of GCN

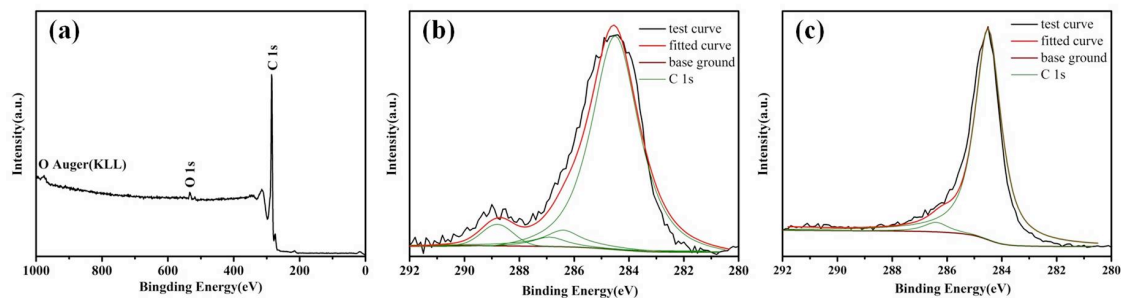

**Fig. S3.**(a) XPS survey spectra obtained for GCN; (b) C1s deconvolution spectra of GCNM; (c) C1s deconvolution spectra of GCN, respectively.

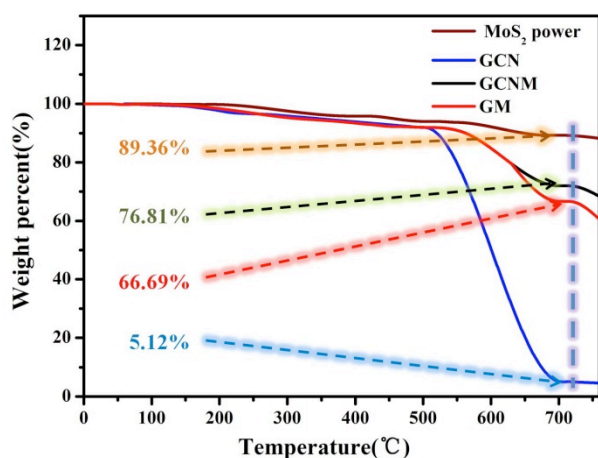

**Fig. S4.**The TGA curves of MoS<sub>2</sub> power, GCN,GM and GCNM under air atmosphere.

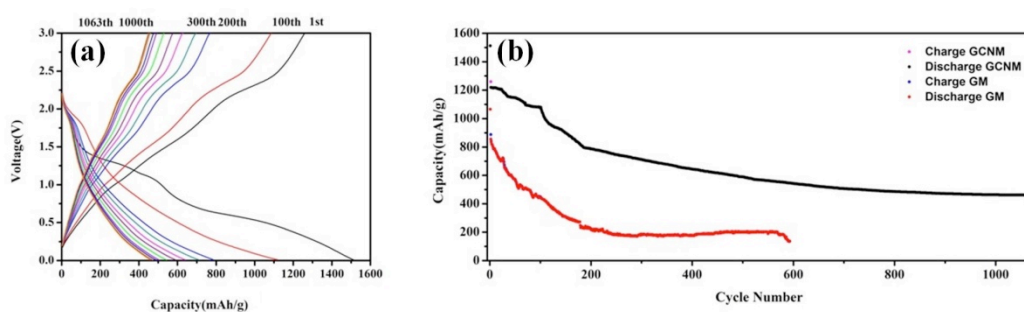

**Fig. S5.** The galvanostatic charge-discharge profiles of the GCNM electrode at a current density of  $0.1\text{A g}^{-1}$  in the voltage range of 0.01–3.0 V vs.  $\text{Li}^+/\text{Li}$ . (b) Cycling performance of GCNM and GM electrodes at a current density of  $0.1\text{A g}^{-1}$ .

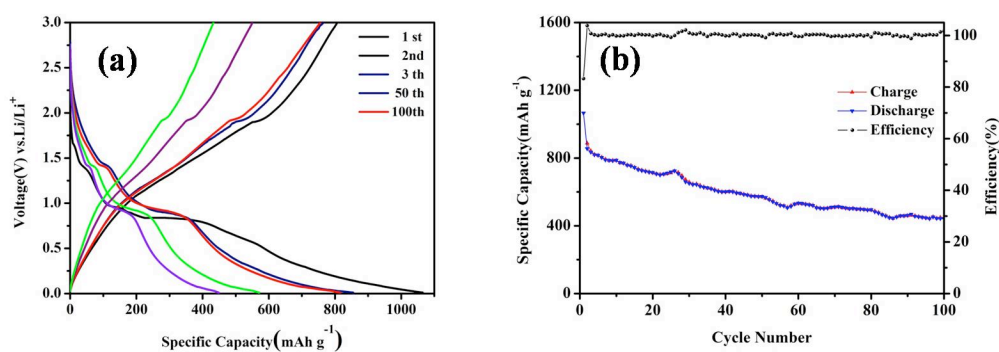

**Fig. S6.** (a) Galvanostatic charge and discharge profiles for the GM electrode of the initial three, 50<sup>th</sup> and 100<sup>th</sup> cycles; (b) The cycling performance of the GM electrode.

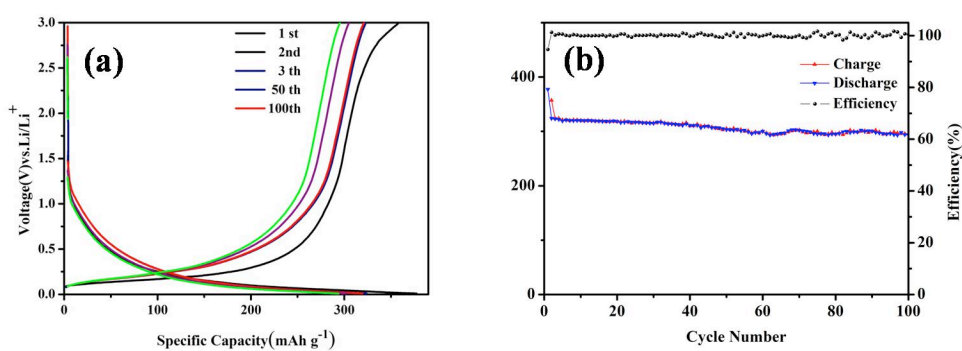

**Fig. S7.** (a) Galvanostatic charge and discharge profiles for the GCN electrode of the initial three, 50<sup>th</sup> and 100<sup>th</sup> cycles; (b) The cycling performance of the GCN electrode.

**Table S1.** A comparison of the electrochemical performance of MoS<sub>2</sub> and its composites with this work.

| Electrode description                                          | First cycle discharge capacity, mAhg <sup>-1</sup> / current density, A g <sup>-1</sup> | First coulombic Efficiency (%) | Cycling stability: reversible capacity, mAh g <sup>-1</sup> /current desity Ag <sup>-1</sup> /after(X)cycles | Rate performance: current desity A g <sup>-1</sup> / reversible capacity, mAh g <sup>-1</sup> |
|----------------------------------------------------------------|-----------------------------------------------------------------------------------------|--------------------------------|--------------------------------------------------------------------------------------------------------------|-----------------------------------------------------------------------------------------------|
| <b>Our work</b>                                                | 1511.6/0.1                                                                              | 83.27                          | 1112 / 0.1/ 100                                                                                              | 0.1,0.2,0.5,1,50.1/1218.0,975.0,769.3,576.5,410.4,1178.2                                      |
| <b>MoS<sub>2</sub>@carbon Spheres<sup>1</sup></b>              | 1020 /0.1                                                                               | 73.50                          | 750 /0.1/50                                                                                                  | 1.0/500                                                                                       |
| <b>MoS<sub>2</sub>/CNT network<sup>2</sup></b>                 | 1715 /0.2                                                                               | 76.10                          | 1456 /0.2/50                                                                                                 | 0.4, 0.6,0.8,1/1431, 1367, 1302,1224                                                          |
| <b>MoS<sub>2</sub>/graphene Nanosheet<sup>3</sup></b>          | 2200 /0.1                                                                               | 59.10                          | 1290/0.1/50                                                                                                  | 1.0/1040                                                                                      |
| <b>3D MoS<sub>2</sub> flowers<sup>4</sup></b>                  | 869 /0.1                                                                                | 65.90                          | 633/0.1/50                                                                                                   | 0.1,0.4,/848 ,740                                                                             |
| <b>MoS<sub>2</sub>-graphene Composites<sup>5</sup></b>         | 1367/0.1                                                                                | 66.70                          | 808/0.1/100                                                                                                  | 1.0/571                                                                                       |
| <b>MoS<sub>2</sub>@CMK-3<sup>6</sup></b>                       | 1056 /0.1                                                                               | 78.03                          | 602 /0.25/100                                                                                                | 0.25,0.5,2/832, 774, 666,564                                                                  |
| <b>Graphene-MoS<sub>2</sub> composited network<sup>7</sup></b> | 1200 /0.6                                                                               | 68.00                          | 1200/0.6/30                                                                                                  | 7.2,8.4/620,270                                                                               |
| <b>CNT@MoS<sub>2</sub><sup>8</sup></b>                         | 1434/0.1                                                                                | 60.01                          | 698/0.1/ 60                                                                                                  | 0.03,0.05,1/653, 459 , 369                                                                    |
| <b>MoS<sub>x</sub>/CNT<sup>9</sup></b>                         | 1549 /0.5                                                                               | 74.80                          | ≥10000/0.05/40                                                                                               | 0.05, 0.2, 0.5,1/1119, 904, 659, 358,197                                                      |
| <b>MoS<sub>2</sub>-CNT film<sup>10</sup></b>                   | 1117/0.1                                                                                | 73.40                          | 960 /0.01/100                                                                                                | 3.2/670                                                                                       |

## Reference

- 1 L. Zhang, X. Wang and D. Lou, *Chem-Eur J.* 2014, **20**,5219-5223.
- 2 S. Wang, X. Jiang, H. Zheng, H. Wu, S. J. Kim and C. Feng, *Nanosci. Nanotech. Let.* 2012, **4**, 378-383.
- 3 K. Zhang, H. J. Kim, X. Shi, J. T. Lee, J. M. Choi, M. S. Song, J. H. Park, *Inorg. Mater.* 2013, **52**, 9807-9812.
- 4 C. B. Ma, X. Qi, B. Chen, S. Bao, Z. Yin, X. J. Wu, H. Zhang, *Nanoscale.* 2014, **6**, 5624-5629.
- 5 K. Chang, W. Chen, *ACS Nano.* 2011, **5**, 4720-4728.
- 6 H. Liu, D. Su, R. Zhou, B. Sun,; G. Wang,; S. Z. Qiao, *H Advanced Energy Materials.* 2012, **2**, 970-975.
- 7 K. Rana, J. Singh, T. J. Lee, J. H. Park, J. H. Ahn, *ACS Appl. Mater. Inter.* 2014, **6**, 11158-11166.
- 8 S. Ding, J. S. Chen, X. W. D. Lou, *Chem-Eur J* 2011, **17**, 13140-13148.
